# Supplementary material for: Contributions of burning incense on indoor air pollution levels and on the health status of patients with chronic obstructive pulmonary disease
Source: PeerJ journal article supplement (doi:10.7717/peerj.9768), 2020-08-31
Supplement: Incense_Buring_Raw_Data.xls [file Incense_Buring_Raw_Data.xls]

## Sheet: Incense Buring Raw Data
ID	House_facing	incenseroom_Floor	Incense_Who	Incense_floor_difference	Residential_location	House_type	House_road	House_yrs	Frequency_opendoor	Family_smoke	Rain	Outdoor_temp	Indoor_temp	Outdoor_moisture	indoor_moisture	PM_perception	SPO2	HR	Age	Gender	BMI	Category_BMI	Occupation	Religion	Ex_habit	Edu	Income	History_smk	WHR	yrs_COPD	SixMWT	COPD_severity	FEV1	CCI	T1PM2.5_Outdoor	T1PM2.5_Living	T1PM2.5_Kich	T1PM2.5_bedroom	T1PM10_Outdoor	T1PM10_Living	T1PM10_Kich	T1PM10_bedroom	T1PM2.5_Incense_room	T2PM2.5_Incense_room	T3PM2.5_Incense_room	T4PM2.5_Incense_room	T5PM2.5_Incense_room	T6PM2.5_Incense_room	T7PM2.5_Incense_room
1	6	3	1	1	1	2	0	420	1	0	0	33.9	31.3	64.5	72.2	2	94	88	78	1	24.22	3	3	5	1	6	1	2	1.02	6	0	3	38	1	32.33	31.33	35.67	52	62	54.67	68	66.33	600	1782.67	744.67	406.33	9999	242.67	559.67
2	3	3	1	1	2	1	1	300	1	0	1	23.9	23.5	90.1	87.1	0	89	100	54	2	23.5	2	2	1	0	4	2	1	1	6	0	4	38	2	96.67	97.67	106.67	76.67	109	89	85.67	79	95	425	539.67	906	503	180.67	202.67
3	1	1	1	1	1	5	0	576	3	0	0	33.2	31.3	63.7	68.6	0	95	91	84	1	21	2	3	2	1	1	2	2	0.85	1	77	3	50	1	23	26	25.5	26.5	19.5	24	25.5	28	294.67	418.67	918.67	763.33	361	134.67	128.67
4	6	1	1	0	1	5	1	696	1	0	1	31.7	29.7	68.6	70.8	2	96	93	63	1	25.56	3	3	2	0	3	2	2	1.02	5	304	2	66	1	65	35.33	28	23.33	20.67	27.67	25	29.33	44	216.67	195.33	174.67	34	43	29
5	6	1	2	1	2	5	0	600	1	0	0	26.5	24.4	57.4	69.1	0	96	85	78	1	25.39	3	3	2	0	3	2	2	0.95	15	267	3	51	1	154.67	114.33	123	112.67	127.67	134.67	145	135.33	104.33	585.67	542.67	1313.33	498	149	148
6	6	1	1	1	2	5	0	780	1	0	0	23.3	23.3	50.9	53.2	0	96	81	81	2	25.08	3	3	2	0	3	2	1	1.01	6	72	2	45	2	113.67	117.33	107	91	123	118.67	112.67	105	115	1693.33	2920	2523.33	452.67	88	69.67
7	3	2	1	1	2	1	0	216	3	0	0	26.1	23.9	68.7	43.1	0	91	73	79	1	25	3	3	2	0	3	2	3	1.01	2	180	2	57	2	204.33	209.33	204.67	216.33	196.33	267.67	242.33	133.33	553.33	544.67	500.33	490.33	9999	708	756
8	6	1	1	1	2	5	0	600	1	1	0	24.7	24.1	61.7	63.5	1	93	88	78	1	20.07	2	3	2	0	3	1	2	0.92	3	162	2	64	2	35	34	43	16	54	47	46	31	167.67	1532.67	1440	1054.67	716.33	154.33	216.33
9	6	3	1	1	2	1	0	420	1	1	0	19.7	19.3	74.8	75.2	0	96	90	60	1	22.77	2	2	2	0	3	2	2	0.9	5	108	2	53	3	176.67	162.33	159	157	167	154	161.33	158	240.67	1676.67	1040	709.67	205.67	142	119.67
10	6	1	2	1	2	5	0	1080	1	0	0	28.7	28	60.9	64.4	0	96	99	76	1	28	4	3	2	1	3	1	2	1.02	3	0	2	64	1	56.67	61.33	55	58	59	64.67	55	53.67	97.67	648.33	654.33	302.67	163.67	148	177
11	6	1	2	1	2	5	1	960	1	1	1	23.4	24.1	82.5	79.6	0	97	94	79	1	27.13	4	3	2	0	3	1	2	0.95	2	300	2	54	3	186.67	499.67	279	471.67	270.67	717.67	263	281.67	1009.67	420	375	739.67	9999	894.67	1777.33
12	6	4	4	0	2	2	1	360	2	1	0	32.8	30.7	64.9	70.6	0	98	99	75	1	26	3	3	2	0	3	2	2	0.98	2	316	2	73	2	156	419.333	152	188.333	248.667	224.333	190.333	238	441.33	627.33	752.67	737	9999	262.33	148
13	6	2	2	1	2	1	1	24	1	0	0	30.1	30.8	57.6	56.6	1	88	72	72	1	22	2	3	2	1	3	1	2	0.94	6	360	3	32	4	170.667	157.333	162	154.667	215.667	206.333	214.667	199	69.33	684	355	419.33	108	103.33	77.67
14	6	1	2	1	2	5	0	600	1	0	0	21.2	19.9	56.8	62.8	0	95	82	77	1	24.3	3	3	2	0	3	2	2	0.93	15	0	2	54	1	85	77.33	77.33	85.33	97.67	82.67	82.67	92.33	79.33	361	418.33	415.67	153.67	116.33	78.67
15	6	1	1	1	2	2	1	12	2	0	0	17.6	17.7	71.7	71	1	96	47	72	1	22.46	2	3	6	1	5	1	1	0.89	2	0	2	27	3	272	578	560	538	237.67	580	554.33	521.67	549	442.33	366.33	400.67	9999	339.67	292
16	6	1	2	1	2	5	0	960	1	0	0	16.7	16.9	67.4	68.1	1	92	85	90	1	22.2	2	3	2	0	3	2	2	0.92	1	0	2	69	1	77.67	182.33	96.33	182.33	84.33	201	119	201	211	230.67	284.33	260.33	9999	209.67	178.33
17	6	1	1	1	2	5	0	780	1	0	0	20.6	19.1	66	71.4	2	97	80	80	1	25	3	3	2	0	3	2	2	0.86	1	288	2	60	2	60	67.67	65	66	80.67	84.67	70.33	87.66	75	144.67	149.33	230	188	79.33	2013.33
18	6	2	1	1	2	1	1	456	1	0	1	26.3	26.8	85.7	80.8	1	97	72	76	1	26.1	3	3	2	0	1	2	2	1.09	10	0	2	79	2	53.33	52.33	43.33	35	5	52.67	140.67	41.33	140.67	362	309.33	289.67	142.33	74.67	55
[truncated: 84 more columns]
